# Supplementary material for: Characterization of miRNAs associated with Botrytis cinerea infection of tomato leaves
Source: BMC Plant Biol. 2015 Jan 16;15:1. doi: 10.1186/s12870-014-0410-4 (PMC4311480; doi:10.1186/s12870-014-0410-4)
Supplement: Additional file 3: Figure S1. — Identification of the novel miRNAs. [file 12870_2014_410_MOESM3_ESM.pdf]

```

1  >miRn1
2  mature sequence      ATTTACCCCAAGTTCGTTGTC
3  processing frequency  0.89
4  obs
5  pri_seq
6  pri_struct
7  t08607804_x13
8  t04896233_x34
9  t08973963_x30
10 t01355201_x21
11 t05605324_x43
12 t03832112_x12
13 t02346705_x15
14 t07165488_x1256
15 t01845419_x35
16
17 -- cu      U      GUA      g      ggaauuacuucucugcaggacaaauagccuagccguggccu -      ---      ---      a- a      gaaag      ga
18 guu      aCAACG AC      GGUAAAGUGGauugcu      aaauucgu      gc      uuca      uuuccau      uaccggau      uc      aca      guu      a
19 |||      |||      |||      |||      |||      |||      |||      |||      |||      |||      |||      |||      |||      |||      |||      |||      |||      |||
20 caa      UGUUGC UG      CCCAUUUAccuacgga      uuugua      cg      aagu      aaaggug      gugguuua      ag      ugu      cag      a
21 cg      aC      U      AAC      a      cuacuaguuagaagcuauuacaa----- u      uuag      ugag      gg      a      aacaa      aa
22
23
24 >miRn3
25 mature sequence      TTGTCATATGTCAGGACTTT
26 processing frequency  0.44
27 obs
28 pri_seq
29 pri_struct
30 t03977250_x85
31 t03093666_x325
32 t05250426_x227
33 t03028432_x370
34 t09162263_x52
35 t00274470_x14
36 t03284876_x10
37 t04500317_x480
38 t02633262_x49
39 t00393630_x50
40 t04614024_x14
41 t04719452_x867
42 t00094227_x245
43 t03905480_x30
44 t02281299_x10
45 t01275524_x12
46
47 -----u      u      G      C      G      UU      -      c      uu      auu
48 agau      gAGCU CUGAC UAUG A      CCu      cag      ccuaucua      uaug      u
49 |||      |||      |||      |||      |||      |||      |||      |||      |||      |||      |||      |||      |||      |||      |||      |||      |||
50 uuua      UUCGA GACUG AUAC U      ggg      guu      ggauagau      auac      a
51 uuacuaguuuuuuccau      U      G      U      G      UU      u      u      --      aaa
52
53
54 >miRn4-1
55 mature sequence      TTGGCTGAGTGAGCATCACGG
56 processing frequency  0.99
57 obs
58 pri_seq
59 pri_struct
60 t03984575_x55
61 t01185842_x14
62 t07503333_x99
63 t04378577_x325
64 t01869422_x404
65 t02709315_x201
66 t04097381_x161090
67 t07136142_x653
68 t08965390_x39
69 t01904439_x414
70 t00556349_x90
71 t08913056_x12
72 t04991482_x37
73
74 cggaauuuggguucuga      u      -      CA      aa      c      auaua--      g
75 ga      uca      guugauuuu      GGUGCUCACUCAGCUAAUAguuuuuuu      gaaa      uca      uug      c
76 |||      |||      |||      |||      |||      |||      |||      |||      |||      |||      |||      |||      |||      |||      |||      |||      |||
77 cu      agu      cagcuaaaGG      CUACGAGUGAGUCGGUIaucaauaguagg      cuuu      agu      aac      g
78 -----u      g      CA      a-      c      aagaggggu      g
79
80
81 >miRn4-2
82 mature sequence      TTGGCTGAGTGAGCATCACTG
83 processing frequency  0.72
84 obs
85 pri_seq
86 pri_struct
87 t03088162_x58
88 t01185842_x14
89 t05059083_x14
90 t00420936_x31
91 t04378577_x125
92 t01869422_x404
93 t00412121_x2776
94 t07480569_x9096
95 t00561348_x24
96 t01150231_x20
97

```

183
